# Supplementary material for: Entrapment of Hydrophilic and Hydrophobic Molecules in Beads Prepared from Isolated Denatured Whey Protein
Source: MDPI journal article supplement (doi:10.3390/pharmaceutics13071001), 2021-07-01
Supplement: s1 [file s1]

# Supplementary Materials: Entrapment of Hydrophilic and Hydrophobic Molecules in Beads Prepared from Isolated Denatured Whey Protein

Joanne Heade, Robert Kent, Sinead B. Bleiel, and David J. Brayden

## S1. Determination of denaturation

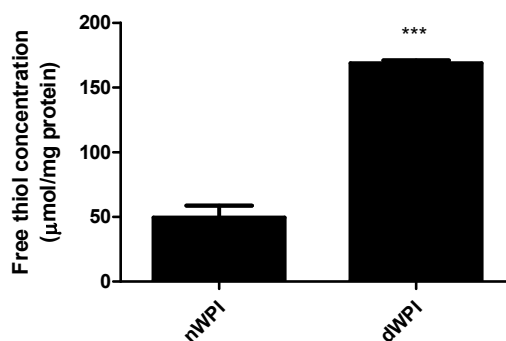

**Figure S1.** The free thiol concentration in nWPI and dWPI. Data is presented as mean  $\pm$  SEM, \*\*\* $P$  > 0.001 ( $n$  = 3).

## S2. Swelling behavior

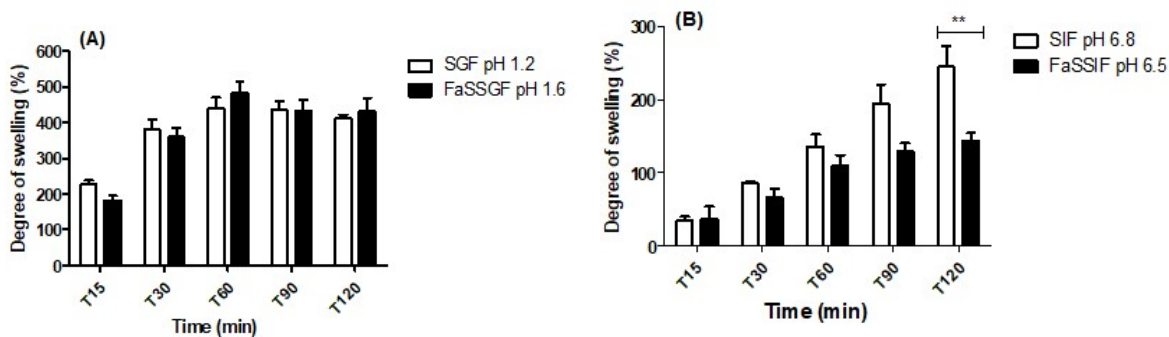

**Figure S2.** A comparison of the swelling behaviour of unloaded beads in (A) SGF / FaSSGF and, (B) SIF / FaSSIF. Data is presented as mean  $\pm$  SD, asterisks indicate significance between the simulated fluids (SIF and FaSSIF) at the time point indicated. \*\* $P$  > 0.01, ( $n$  = 3 batches).

### S3. Release modelling

**Table S1.** The formulas used for each mathematical model of drug release. F = fraction (%) of drug released over time (t). Adapted from Zhang et al. [23].

| Model            | Formula                    | Parameters                                                                                                                             |
|------------------|----------------------------|----------------------------------------------------------------------------------------------------------------------------------------|
| Zero Order       | $F = k_0(t)$               | $k_0$ = zero order release constant                                                                                                    |
| First Order      | $F = 100(1 - e^{-k_1(t)})$ | $k_1$ = first order release constant                                                                                                   |
| Higuchi          | $F = k_H(t^{0.5})$         | $k_H$ = Higushi release constant                                                                                                       |
| Korsmeyer-Peppas | $F = k_{KP}(t^n)$          | $k_{KP}$ = release constant incorporating structural and geometric characteristics of the drug-dosage form<br>n = diffusional exponent |

**Table S2.** The formulas used to calculate  $R^2_{adj}$  and AIC. These parameters were used to find the model with the best fit for each release profile. Considering both values is appropriate when comparing models with different numbers of parameters, as described by Zhang et al. [23].

| Equation                     | Formula                                    | Parameters                                                                             |
|------------------------------|--------------------------------------------|----------------------------------------------------------------------------------------|
| $R^2$ adjusted               | $R^2_{adj} = 1 - \frac{n-1}{n-p}(1 - R^2)$ | n = number of data points<br>P = number of parameters                                  |
| Akaike Information Criterion | $AIC = (n)\ln(WSS) + 2(p)$                 | n = number of data points<br>P = number of parameters<br>WSS = weighted sum of squares |

**Table S3.** The  $R^2_{adj}$  and other parameters calculated for each release model applied to the SGF/SIF release data. Highlighted values in grey indicate the best fit (highest  $R^2_{adj}$  and the lowest AIC).

|                  | Parameters                 | SF      | FD4     | Fast Green | Curcumin |
|------------------|----------------------------|---------|---------|------------|----------|
| Zero order       | $k_0$                      | 0.489   | 0.134   | 0.317      | 0.024    |
|                  | $R^2_{adj}$                | 0.7752  | 0.9224  | 0.8893     | 0.9290   |
|                  | AIC                        | 59.7923 | 33.4488 | 54.3286    | 4.3666   |
| First order      | $k_1$ (min <sup>-1</sup> ) | 0.012   | 0.002   | 0.004      | 0.000    |
|                  | $R^2_{adj}$                | 0.972   | 0.946   | 0.815      | 0.928    |
|                  | AIC                        | 40.580  | 30.723  | 58.737     | 4.741    |
| Higuchi          | $k_H$                      | 6.333   | 1.686   | 3.795      | 0.291    |
|                  | $R^2_{adj}$                | 0.9836  | 0.8899  | 0.6728     | 0.8065   |
|                  | AIC                        | 39.2469 | 36.7881 | 63.3704    | 13.4063  |
| Korsmeyer-Peppas | $k_{KP}$                   | 6.275   | 0.439   | 0.065      | 0.026    |
|                  | n                          | 0.528   | 0.439   | 1.311      | 1.083    |
|                  | $R^2_{adj}$                | 0.989   | 0.789   | 0.904      | 0.957    |
|                  | AIC                        | 36.295  | 31.788  | 53.616     | 1.3520   |

$R^2_{adj}$  =  $R^2$  adjusted, AIC = Akaike Information Criterion
